# Supplementary material for: Human MC4R variants affect endocytosis, trafficking and dimerization revealing multiple cellular mechanisms involved in weight regulation
Source: PubMed Central journal article supplement (PMC7994375; doi:10.1016/j.celrep.2021.108862), 2021-03-23
Supplement: mmc1.pdf [file mmc1.pdf]

**Supplemental information**

**Human MC4R variants affect endocytosis,  
trafficking and dimerization revealing multiple  
cellular mechanisms involved in weight regulation**

**Bas Brouwers, Edson Mendes de Oliveira, Maria Marti-Solano, Fabiola B.F. Monteiro, Suli-Anne Laurin, Julia M. Keogh, Elana Henning, Rebecca Bounds, Carole A. Daly, Shane Houston, Vikram Ayinampudi, Natalia Wasiluk, David Clarke, Bianca Plouffe, Michel Bouvier, M. Madan Babu, I. Sadaf Farooqi, and Jacek Mokrosiński**

# SUPPLEMENTAL INFORMATION

## Figure S1

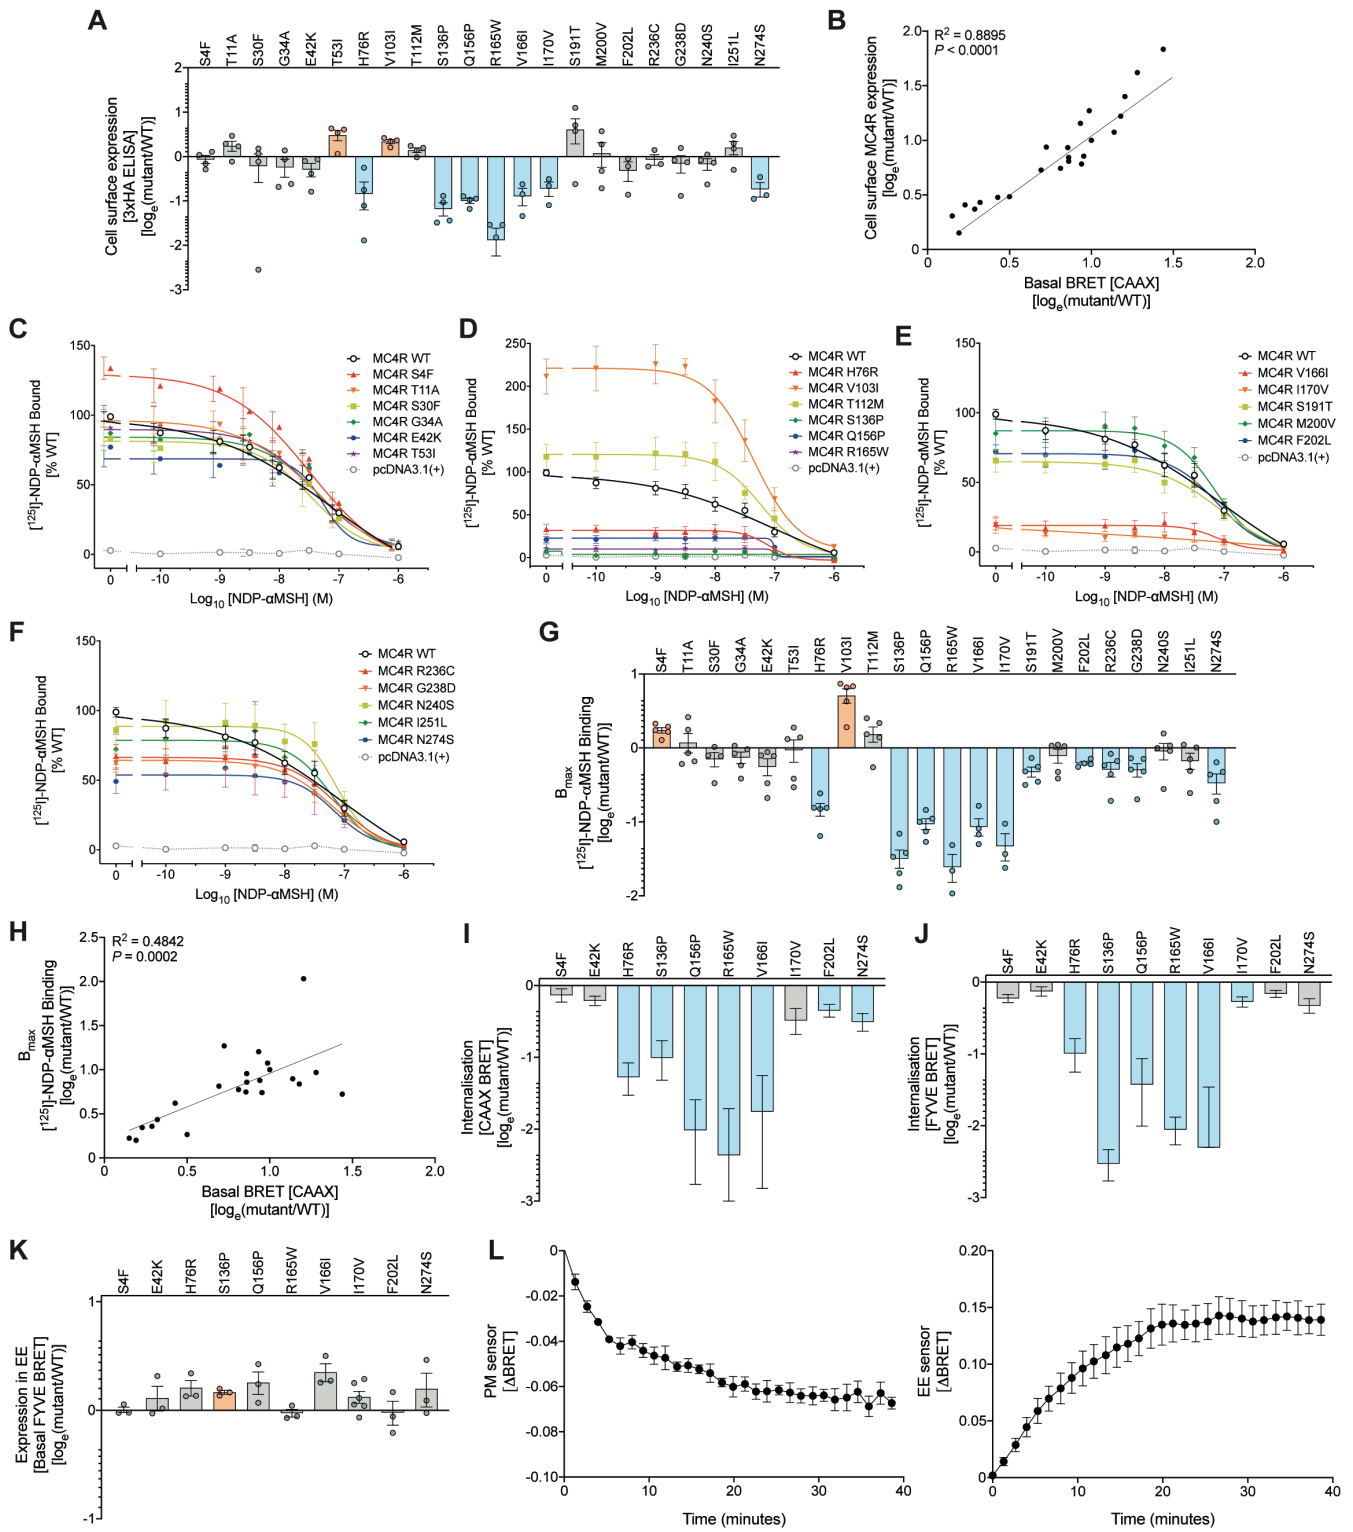

**Figure S1. Cellular localization and binding of MC4R mutants.** **A**, Cell surface expression of WT and mutant MC4Rs measured by enzyme-linked immunosorbent assay (ELISA). **B**, Pearson correlation between receptor number at the plasma membrane quantified using the PM sensor (basal ebBRET) and cell surface ELISA. **C-F** Competitive binding assays. HEK293 cells transiently expressing WT or mutant MC4R were incubated with [<sup>125</sup>I]-NDP- $\alpha$ -MSH in the presence of increasing concentrations of unlabelled ligand. **G**, Apparent maximal specific binding ( $B_{max}$ ). **H**, Pearson correlation between receptor number at the plasma membrane quantified using the PM sensor (basal ebBRET) and  $B_{max}$ . **I**, Agonist-induced internalisation as quantified using the PM sensor, which was corrected for basal ebBRET [rGFP-CAAX]. **J**, Agonist-induced internalisation quantified by means of the EE sensor, which was corrected for basal ebBRET [rGFP-CAAX]. **K**, Basal expression of receptor mutants in EEs (basal ebBRET using the EE sensor). **L**, Kinetics experiment showing NDP- $\alpha$ -MSH dependent MC4R endocytosis, using the PM sensor (left panel) and the EE sensor (right panel).  $\Delta$ BRET is defined as  $BRET_{stimulated} - BRET_{vehicle}$ . **A, G, I-K**, Data are expressed as  $\log_e(\text{mutant}/\text{WT})$  and plotted as mean  $\pm$  standard error of 3-6 independent experiments. In panels, **A, G, I, J, K** mutants classified as Gain-of-Function (GoF) (orange), Loss-of-Function (LoF) (blue) or WT-like (grey) based on statistically significant differences between WT and mutant (unpaired *t*-test with Welch's correction;  $p < 0.05$ ). Related to Figure 1.

Figure S2

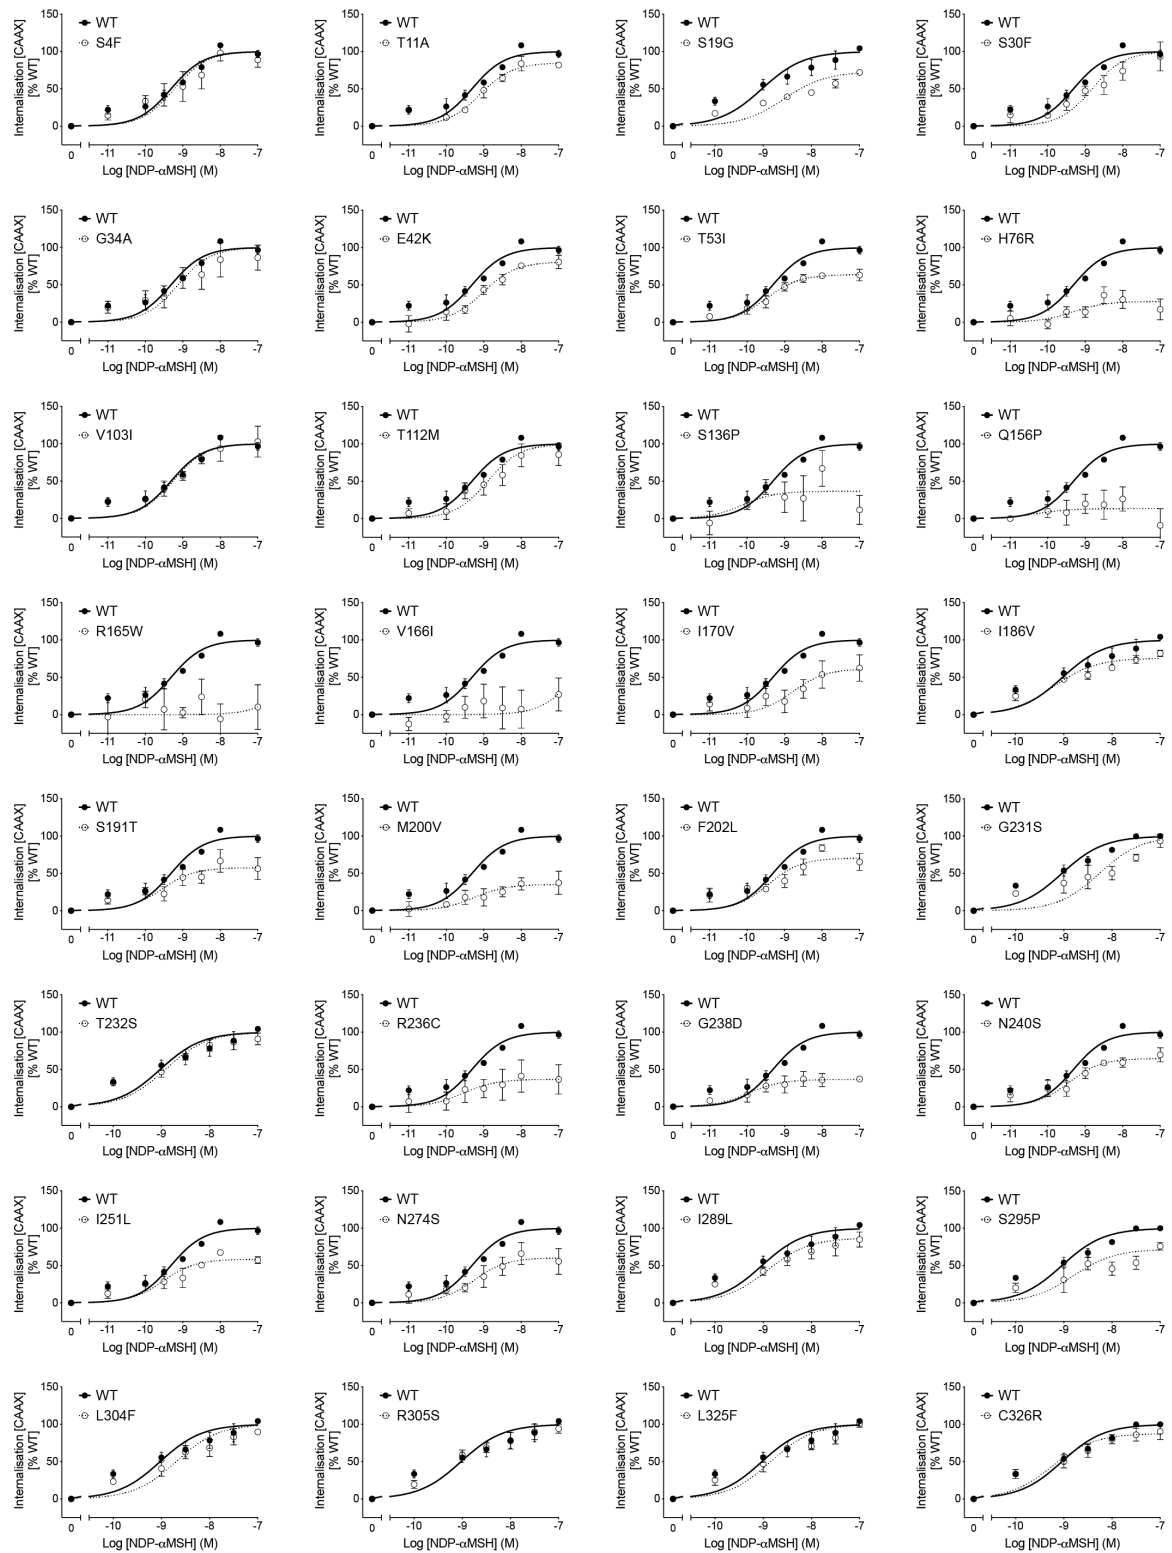



**Figure S2. Impaired endocytosis of mutants in MC4R.** Agonist (NDP- $\alpha$ -MSH)-induced receptor endocytosis of wild-type MC4R and mutants quantified by ebBRET, using the PM sensor. Internalisation is expressed as percentage of the maximal  $\Delta$ ebBRET obtained with wild-type (WT) receptor and is corrected for basal receptor presence at the plasma membrane as measured by the PM sensor (see Methods). Data are plotted as mean  $\pm$  standard error of 3 independent experiments. Related to Figure 1.

**Figure S3**

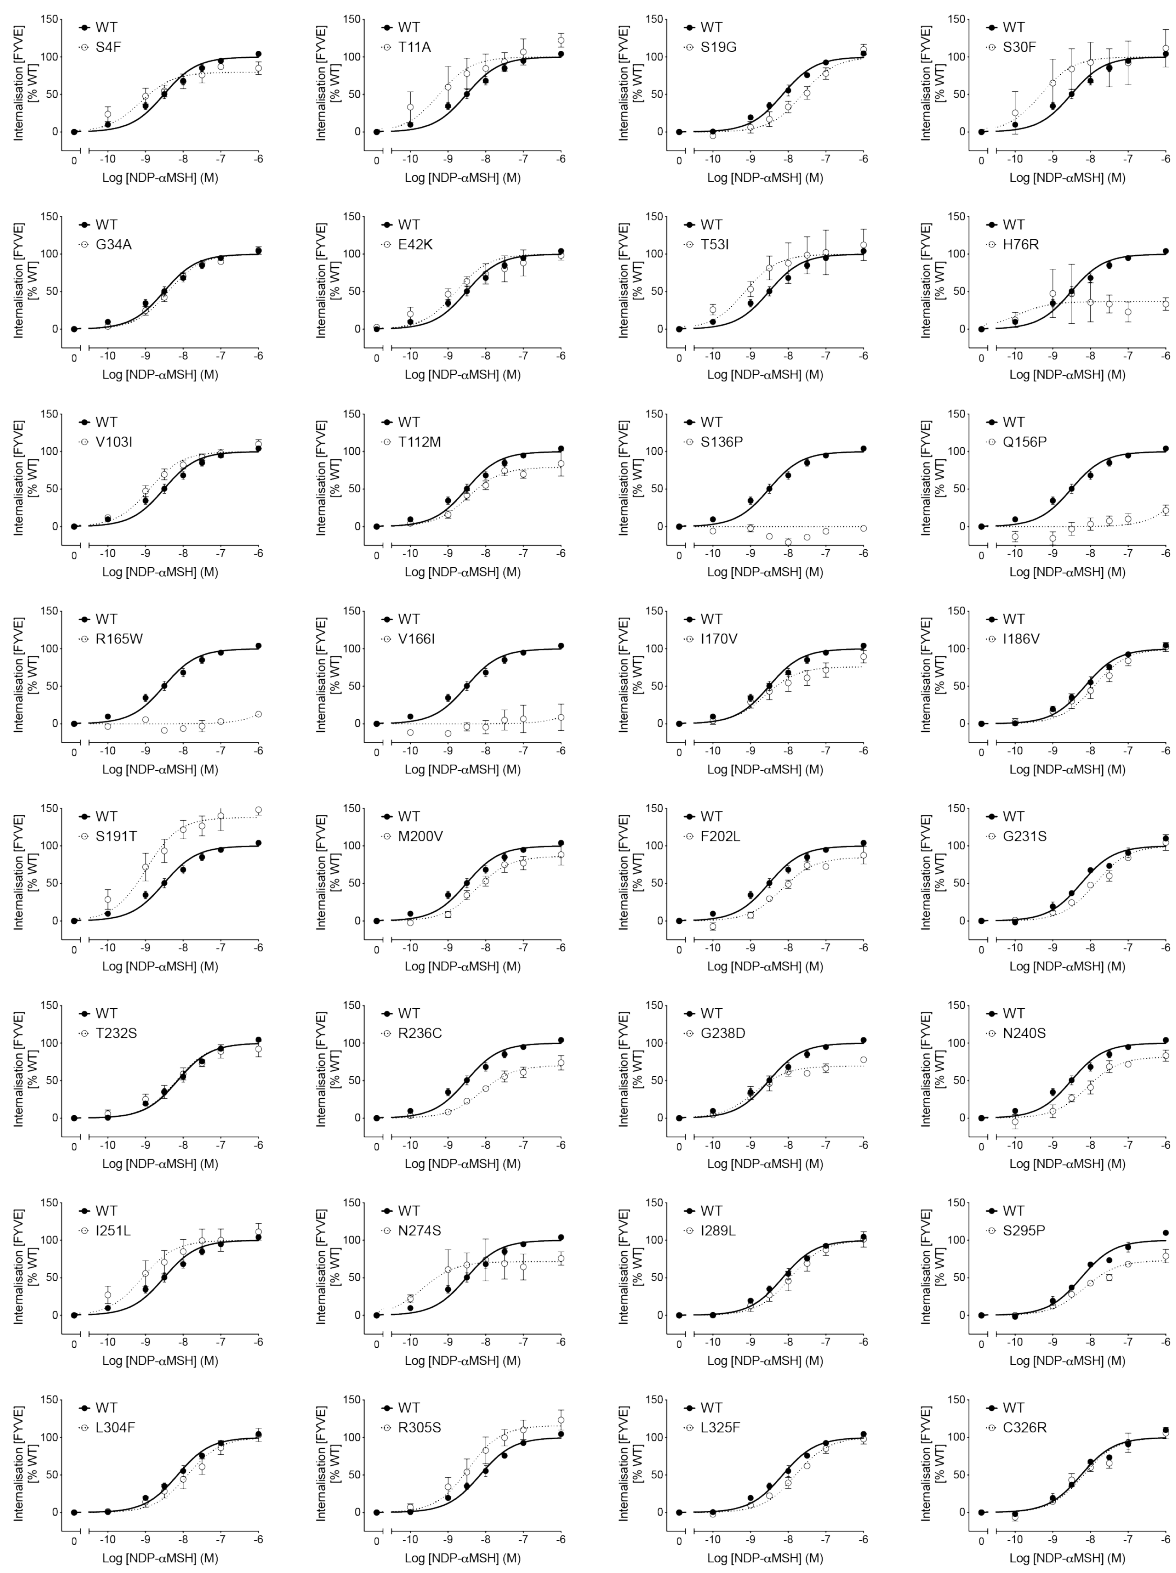

**Figure S3. Impaired trafficking of mutants in MC4R into early endosomes.** Agonist (NDP- $\alpha$ -MSH)-induced endocytosis of wild-type (WT) MC4R and mutants quantified by ebBRET, using the EE sensor. Internalisation is expressed as percentage of the maximal  $\Delta$ ebBRET obtained with wild-type (WT) receptor and is corrected for basal receptor presence at the plasma membrane as measured by the PM sensor (see Methods). Data are plotted as mean  $\pm$  standard error of 3-6 independent experiments. Related to Figure 1.

**Figure S4**

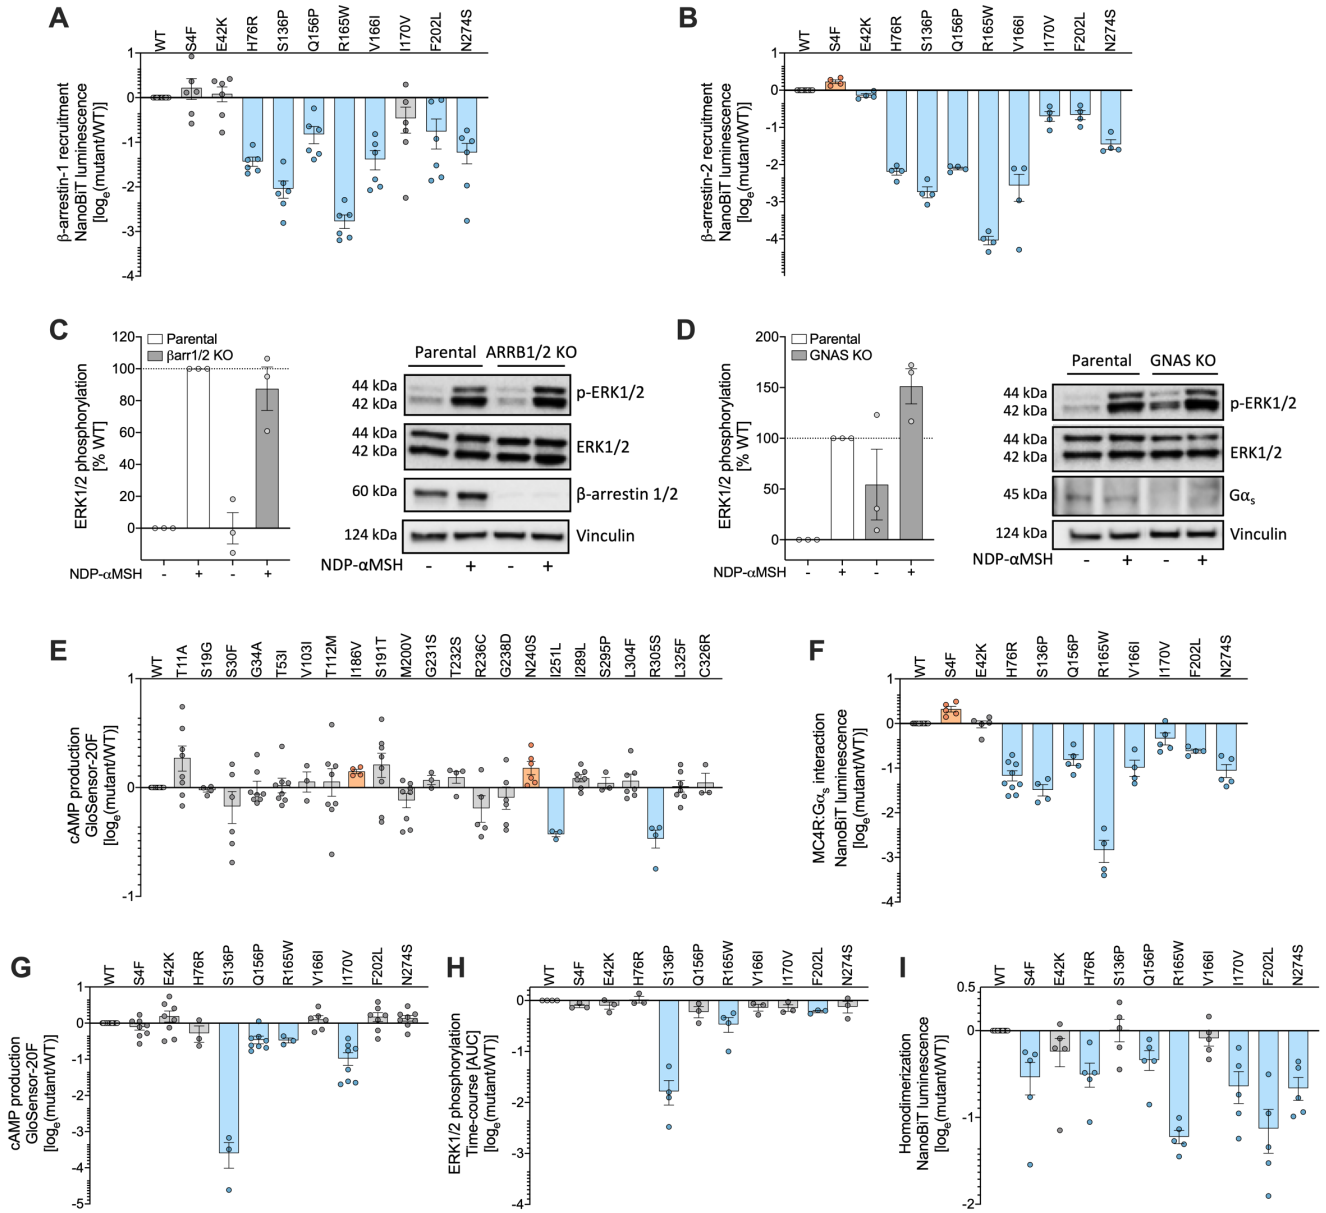

**Figure S4. MC4R mutants impair G-protein dependent and G-protein independent signaling.**

**A-B**, Impact of MC4R mutants which decrease PM expression on **(A)**  $\beta$ -arrestin-1 and **(B)**  $\beta$ -arrestin-2 recruitment. **C-D**, NDP- $\alpha$ -MSH-dependent ERK1/2 phosphorylation in **(C)** ARRB1/2 and **(D)** GNAS knockout cells. Representative immunoblots shown were probed for total ERK1/2, phosphorylated ERK1/2 [p-ERK1/2],  $\beta$ -arrestin-1/2 or  $G\alpha_s$ , and vinculin as an additional loading control. **E**, cAMP production for mutants that do not negatively affect receptor number at the plasma membrane. **F**, MC4R :  $G\alpha_s$  interaction and **G**, cAMP production upon receptor stimulation with 1  $\mu$ M NDP- $\alpha$ -MSH. **H**, NDP- $\alpha$ -MSH mediated ERK1/2 phosphorylation for MC4R mutants. **i**, MC4R homodimerization quantified using NanoBiT. All data in panels **A-B** and **F-I** are expressed as  $\log_e(\text{mutant}/\text{WT})$  and plotted as mean  $\pm$  standard error of 3-9 independent experiments and mutants classified as Gain-of-Function (GoF) (orange), Loss-of-Function (LoF) (blue) or WT-like (grey) based on statistically significant differences between WT and mutant (unpaired *t*-test with Welch's correction;  $p < 0.05$ ). **C-D**, Data are expressed as a percentage of maximal control response [% WT] and plotted as mean  $\pm$  standard error from 3-14 independent experiments. Statistical significance was determined by two-way ANOVA and Dunnett's multiple comparison test and no difference was observed when NDP- $\alpha$ -MSH-stimulated MC4R WT [KO cell line] was compared to the parental line). Related to Figures 2 and 4.

**Figure S5**

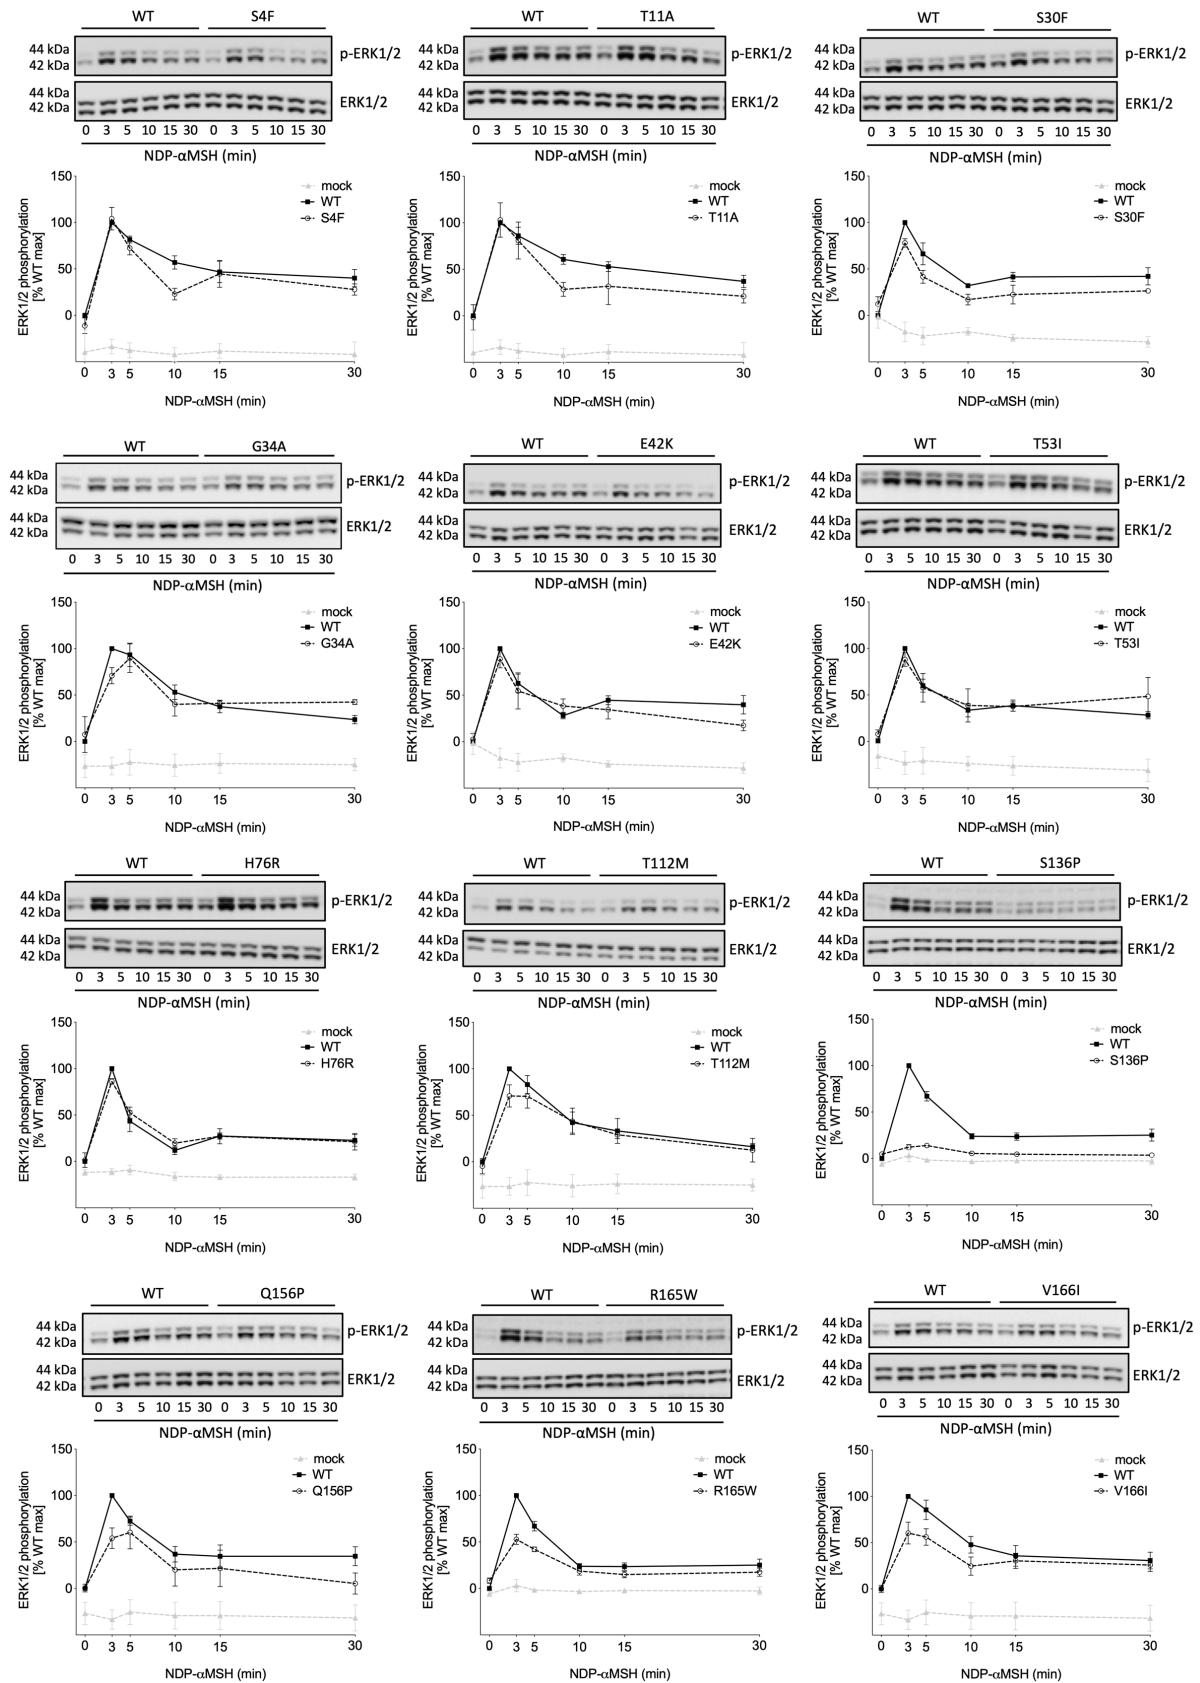

**Figure S5. Effect of MC4R mutants on ERK1/2 phosphorylation.** Time course experiment showing ERK1/2 phosphorylation downstream of MC4R upon stimulation with 1  $\mu$ M NDP- $\alpha$ MSH (MC4R S4F to MC4R V166I mutants). Representative blots for p-ERK1/2 and ERK1/2 are shown. Each graph represents mean  $\pm$  standard error from 3-5 independent experiments. Statistics were performed on area under the curve (AUC) quantifications of each graph (Methods). Related to Figure 4.

**Figure S6**

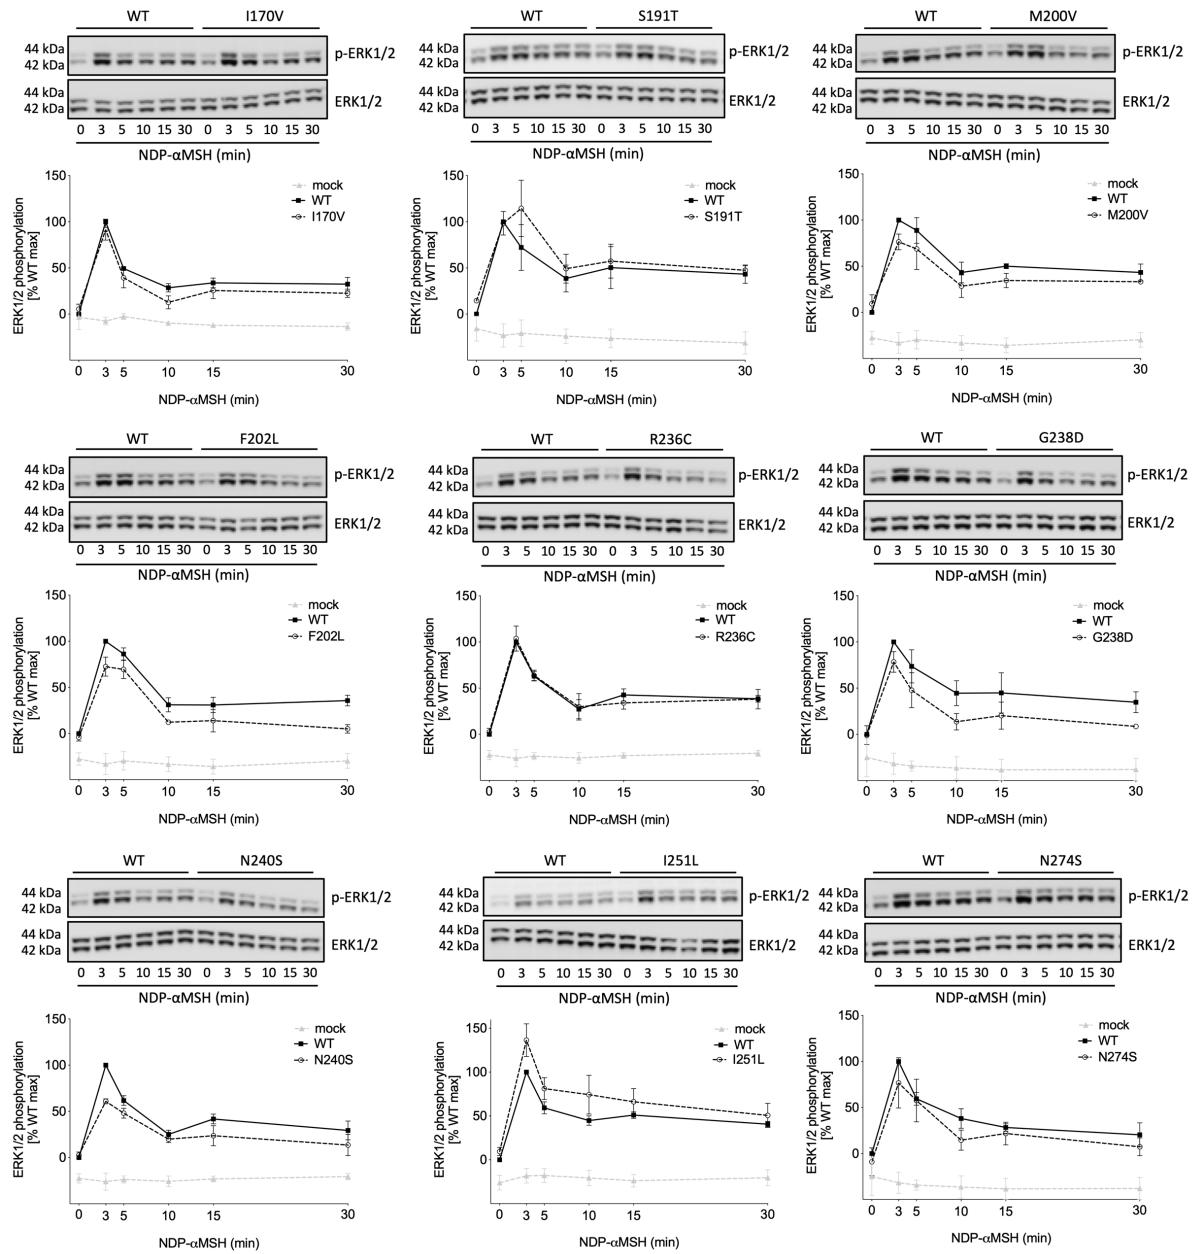



**Figure S6. Effect of MC4R mutants on ERK1/2 phosphorylation.** Time course experiment showing ERK1/2 phosphorylation downstream of MC4R upon stimulation with 1  $\mu$ M NDP- $\alpha$ MSH (MC4R I170V to MC4R N274S mutants). Representative blots for p-ERK1/2 and ERK1/2 are shown. Each graph represents mean  $\pm$  standard error from 3-5 independent experiments. Statistics were performed on area under the curve (AUC) quantifications of each graph (Methods). Related to Figure 4.

**Figure S7**

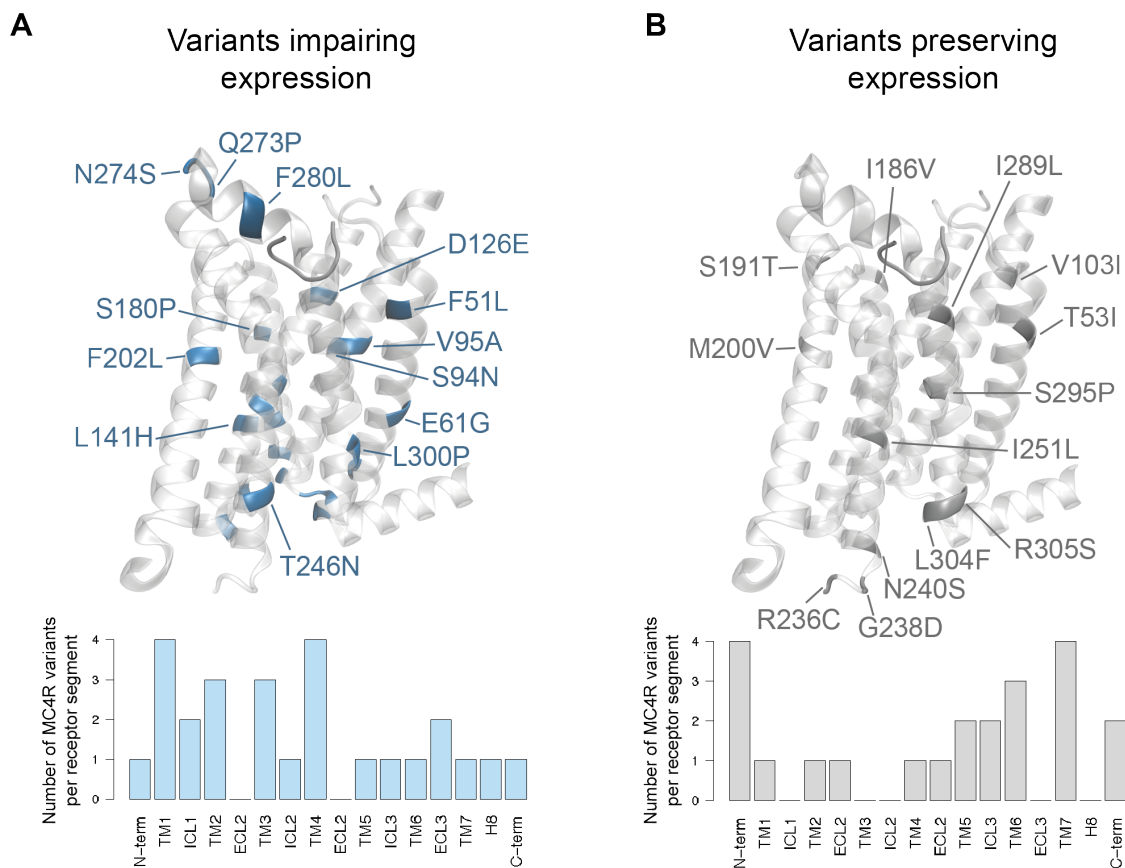

**Figure S7. Structural mapping of MC4R mutants that do/do not affect plasma membrane expression.** Receptor mutants resulting in (A) reduced ( $\leq 85\%$  of WT) or (blue) (B) normal plasma membrane expression (grey) are shown mapped onto a cartoon representation of the crystallised MC4R receptor structure (PDB ID: 6W25). The crystallised ligand, SHU9119, is shown as cartoon in dark grey. Mapping the abundance of both classes of mutants in different receptor structural segments reveals a different distribution of mutants disrupting or preserving MC4R expression. Related to Figure 1.

Figure S8

A

| Peptide                                                | Nmod |         |   |     |     |     |     |       |    |       |    |    |    |                 | Cmod            |                 |                 |                 |   |   |   |   |    |   |    |   |   |   |   |   |   |    |
|--------------------------------------------------------|------|---------|---|-----|-----|-----|-----|-------|----|-------|----|----|----|-----------------|-----------------|-----------------|-----------------|-----------------|---|---|---|---|----|---|----|---|---|---|---|---|---|----|
| MSH tetrapeptide                                       | H    | H F R W |   |     |     |     |     |       |    |       |    |    |    |                 | OH              |                 |                 |                 |   |   |   |   |    |   |    |   |   |   |   |   |   |    |
|                                                        |      | 1       | 2 | 3   | 4   | 5   | 6   | 7     | 8  | 9     | 10 | 11 | 12 | 13              |                 |                 |                 |                 |   |   |   |   |    |   |    |   |   |   |   |   |   |    |
| ACTH (4-10)                                            | H    |         |   |     | M   | E   | H   | F     | R  | W     | G  |    |    |                 | OH              |                 |                 |                 |   |   |   |   |    |   |    |   |   |   |   |   |   |    |
| $\alpha$ MSH                                           | Ac   |         | S | Y   | S   | M   | E   | H     | F  | R     | W  | G  | K  | P               | V               | NH <sub>2</sub> |                 |                 |   |   |   |   |    |   |    |   |   |   |   |   |   |    |
| Des-acetyl- $\alpha$ MSH                               | -    |         | S | Y   | S   | M   | E   | H     | F  | R     | W  | G  | K  | P               | V               | NH <sub>2</sub> |                 |                 |   |   |   |   |    |   |    |   |   |   |   |   |   |    |
| Diacetyl- $\alpha$ MSH                                 | 2xAc |         | S | Y   | S   | M   | E   | H     | F  | R     | W  | G  | K  | P               | V               | NH <sub>2</sub> |                 |                 |   |   |   |   |    |   |    |   |   |   |   |   |   |    |
| DP- $\alpha$ MSH                                       | Ac   |         | S | Y   | S   | M   | E   | H     | dF | R     | W  | G  | K  | P               | V               | NH <sub>2</sub> |                 |                 |   |   |   |   |    |   |    |   |   |   |   |   |   |    |
| NDP- $\alpha$ MSH                                      | Ac   |         | S | Y   | S   | Nle | E   | H     | dF | R     | W  | G  | K  | P               | V               | NH <sub>2</sub> |                 |                 |   |   |   |   |    |   |    |   |   |   |   |   |   |    |
| H-9220                                                 | Ac   |         |   |     | C   | E   | H   | dF    | R  | W     | C  | K  | P  | V               | NH <sub>2</sub> |                 |                 |                 |   |   |   |   |    |   |    |   |   |   |   |   |   |    |
| H-6268                                                 | Ac   |         |   |     | dR  | C   | E   | H     | dF | R     | W  | C  |    |                 | NH <sub>2</sub> |                 |                 |                 |   |   |   |   |    |   |    |   |   |   |   |   |   |    |
| LY-2112688                                             | Ac   |         |   |     | R   | C   | E   | H     | dF | R     | W  | C  |    |                 | NH <sub>2</sub> |                 |                 |                 |   |   |   |   |    |   |    |   |   |   |   |   |   |    |
| Setmelanotide                                          | Ac   |         |   |     | R   | C   | dA  | H     | dF | R     | W  | C  |    |                 | NH <sub>2</sub> |                 |                 |                 |   |   |   |   |    |   |    |   |   |   |   |   |   |    |
| Melanotan II                                           | Ac   |         |   |     | Nle | D   | H   | dF    | R  | W     | K  |    |    |                 | NH <sub>2</sub> |                 |                 |                 |   |   |   |   |    |   |    |   |   |   |   |   |   |    |
| SHU9119                                                | Ac   |         |   |     | Nle | D   | H   | d2Nal | R  | W     | K  |    |    |                 | NH <sub>2</sub> |                 |                 |                 |   |   |   |   |    |   |    |   |   |   |   |   |   |    |
| "MC4R agonist"                                         | -    |         |   |     |     | bA  | H   | dF    | R  | W     | E  |    |    |                 | NH <sub>2</sub> |                 |                 |                 |   |   |   |   |    |   |    |   |   |   |   |   |   |    |
| HS024                                                  | Ac   |         |   | C   | Nle | R   | H   | d2Nal | R  | W     | G  | C  |    |                 | NH <sub>2</sub> |                 |                 |                 |   |   |   |   |    |   |    |   |   |   |   |   |   |    |
| JKC-366                                                | -    |         |   | Mpa | Nle | R   | H   | d2Nal | R  | W     | G  | C  |    |                 | NH <sub>2</sub> |                 |                 |                 |   |   |   |   |    |   |    |   |   |   |   |   |   |    |
| HP-228                                                 | Ac   |         |   |     | Nle | Q   | H   | dF    | R  | dW    | G  |    |    |                 | NH <sub>2</sub> |                 |                 |                 |   |   |   |   |    |   |    |   |   |   |   |   |   |    |
| Nonapeptide-1                                          | H    |         |   |     | M   | P   | dF  | R     | dW | F     | K  | P  | V  | NH <sub>2</sub> |                 |                 |                 |                 |   |   |   |   |    |   |    |   |   |   |   |   |   |    |
| $\beta$ MSH                                            | H    |         | A | E   | K   | K   | D   | E     | G  | P     | Y  | R  | M  | E               | H               | F               | R               | W               | G | S | P | P | K  | D | OH |   |   |   |   |   |   |    |
| VA- $\beta$ MSH                                        | ?    | V       | A | E   | K   | K   | D   | E     | G  | P     | Y  | R  | M  | E               | H               | F               | R               | W               | G | S | P | P | K  | D | OH |   |   |   |   |   |   |    |
| monkey $\beta$ MSH                                     | H    |         |   |     | D   | E   | G   | P     | Y  | R     | M  | E  | H  | F               | R               | W               | G               | S               | P | P | K | D | OH |   |    |   |   |   |   |   |   |    |
| porcine $\beta$ MSH                                    | ?    |         |   |     | D   | E   | G   | P     | Y  | K     | M  | E  | H  | F               | R               | W               | G               | S               | P | P | K | D | ?  |   |    |   |   |   |   |   |   |    |
| HS014                                                  | As   |         |   |     |     |     | C   | E     | H  | d2Nal | R  | W  | C  | P               | K               | D               | NH <sub>2</sub> |                 |   |   |   |   |    |   |    |   |   |   |   |   |   |    |
| JKC-363                                                | -    |         |   |     |     |     | Mpa | E     | H  | d2Nal | R  | W  | G  | C               | P               | K               | D               | NH <sub>2</sub> |   |   |   |   |    |   |    |   |   |   |   |   |   |    |
| JKC-372                                                | -    |         |   |     |     |     | Mpa | E     | H  | dF    | R  | W  | C  | S               | P               | K               | D               | NH <sub>2</sub> |   |   |   |   |    |   |    |   |   |   |   |   |   |    |
| $\gamma_1$ MSH                                         | H    |         |   |     | Y   | V   | M   | G     | H  | F     | R  | W  | D  | R               | F               | NH <sub>2</sub> |                 |                 |   |   |   |   |    |   |    |   |   |   |   |   |   |    |
| [Lys <sup>6</sup> ]- $\gamma_1$ MSH                    | ?    |         |   |     | K   | Y   | V   | M     | G  | H     | F  | R  | W  | D               | R               | F               | NH <sub>2</sub> |                 |   |   |   |   |    |   |    |   |   |   |   |   |   |    |
| $\gamma_2$ MSH                                         | H    |         |   |     | Y   | V   | M   | G     | H  | F     | R  | W  | D  | R               | F               | G               | OH              |                 |   |   |   |   |    |   |    |   |   |   |   |   |   |    |
| [dTrp <sup>6</sup> ]- $\gamma_2$ MSH                   | H    |         |   |     | Y   | V   | M   | G     | H  | F     | R  | dW | D  | R               | F               | G               | OH              |                 |   |   |   |   |    |   |    |   |   |   |   |   |   |    |
| [Lys <sup>6</sup> , Nle <sup>4</sup> ]- $\gamma_2$ MSH | Ac   |         |   |     | K   | Y   | V   | M     | G  | H     | F  | R  | W  | D               | R               | F               | G               | NH <sub>2</sub> |   |   |   |   |    |   |    |   |   |   |   |   |   |    |
| $\gamma_3$ MSH                                         | H    |         |   |     | Y   | V   | M   | G     | H  | F     | R  | W  | D  | R               | F               | G               | R               | R               | N | G | S | S | S  | S | G  | V | G | G | A | A | Q | OH |

B

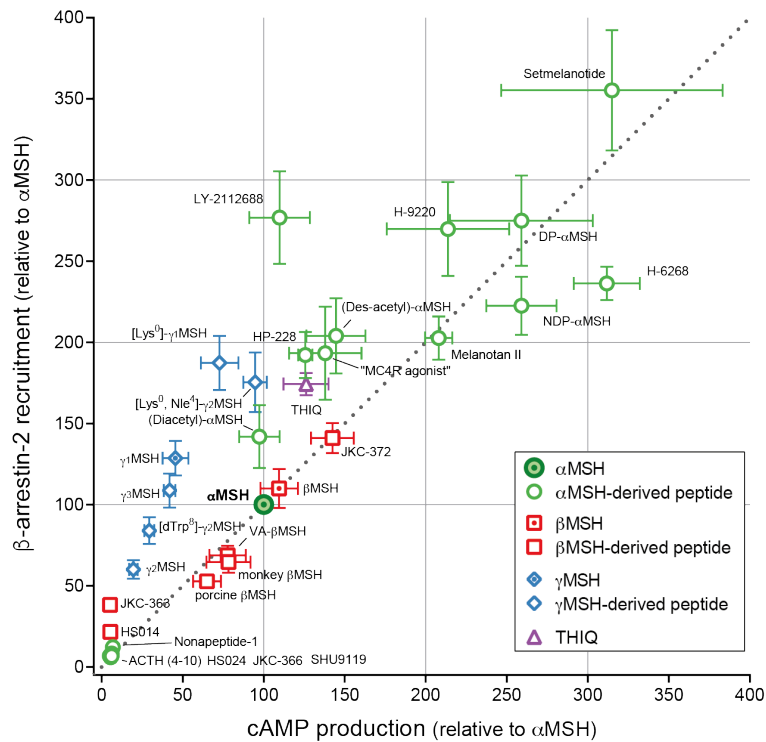

**Figure S8. Characterisation of signaling by MC4R ligands and agonists. A,** Comparison of the primary amino acid sequence of MC4R peptide ligands and endogenous MC4R agonists ( $\alpha$ -MSH,  $\beta$ -MSH and  $\gamma_1$ -MSH) that were tested. D-enantiomers of amino acid residues are indicated with a (d) in front of the symbol, and unnatural amino acids are denoted: Nle, norleucine; d2Nal, 2-naphthylalanine; Mpa, 3-mercaptopropionic acid. N-terminal (Nmod) and C-terminal modifications (Cmod) are indicated as follows: H, N-terminal free amino moiety; OH, unmodified C-terminal carboxyl group; Ac, acetylation; 2xAc, diacetylation, NH<sub>3</sub>, amidation; (?), not specified. Lines before and after the amino acid residues indicate and span a fragment of the sequence which forms a cyclic peptide stabilized by either a disulphide bond (orange) or a salt bridge (purple). **B,** signalling plot for 32 MC4R ligands (31 peptides and the small molecule agonist; THIQ, tetrahydroisoquinoline). Equimolar efficacy for 10 nM of each ligand determined using stable HEK293 reporter cell lines expressing MC4R WT and cAMP GloSensor™ or  $\beta$ -arrestin-2 split NanoLuciferase BiBiT reporter for the quantification of cAMP production and  $\beta$ -arrestin-2 recruitment, respectively (see Methods). Data presented as mean  $\pm$  standard error from 4-5 independent experiments normalized to  $\alpha$ -MSH signalling efficacy in the respective assay. Related to Figure 2.

**Data S1. Uncropped immunoblot images. Related to Figure 3, Figure 4 and Figure S4.** For better data visualization, several western blots images showed in this manuscript were cropped for removal of extra lanes in the same blot. It is important to highlight that images collated together in a single image are always originated from the same WB gel and image acquisition, allowing us to compare and analyze the bands in the blots. In the next pages you can find all uncropped western blots images, from all experimental replicates (minimum of 3), performed for this paper. Also, all selected representative WB image used in the paper are identified accordingly.

## Data S1

### Experiment 1

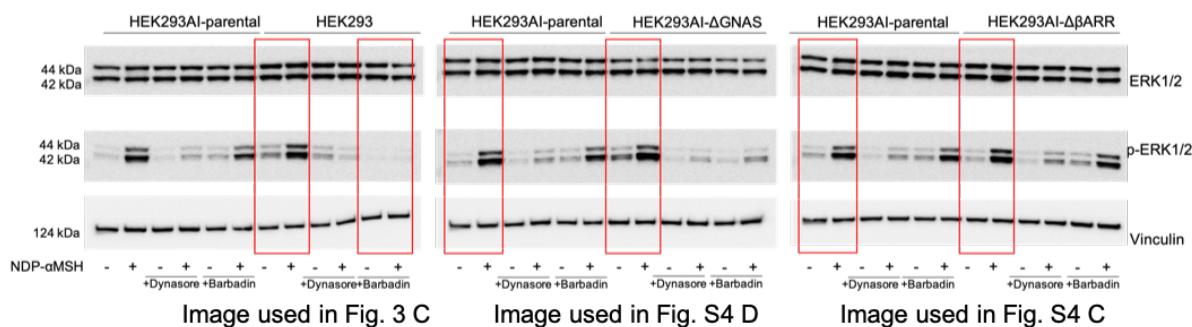

### Experiment 2

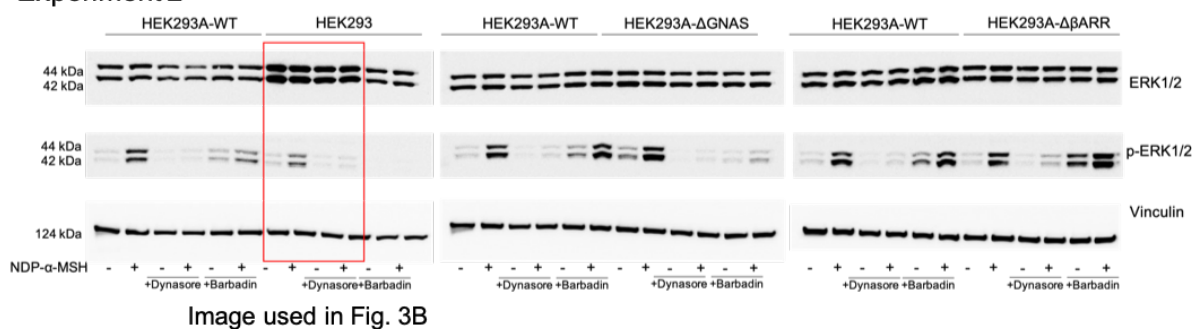

### Experiment 3

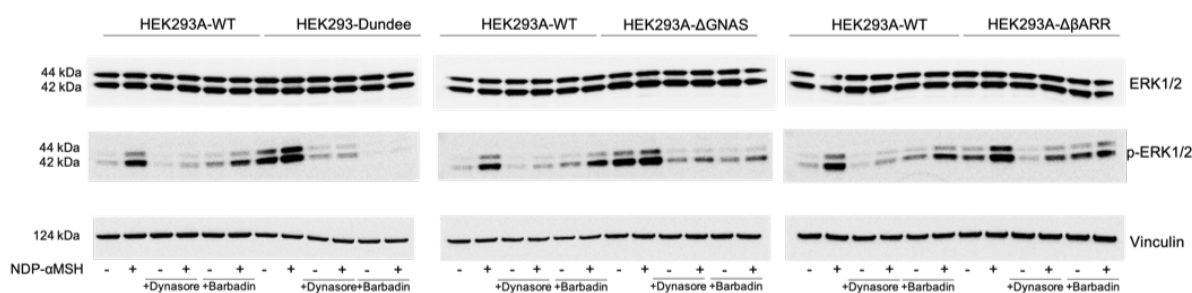

**Data S1. Uncropped immunoblot images. ERK1/2 Western Blot using KO cell lines.** Images in the red rectangles are the data showed in the corresponding figures. Related to Figure 3 and Figure S4.

## Data S1

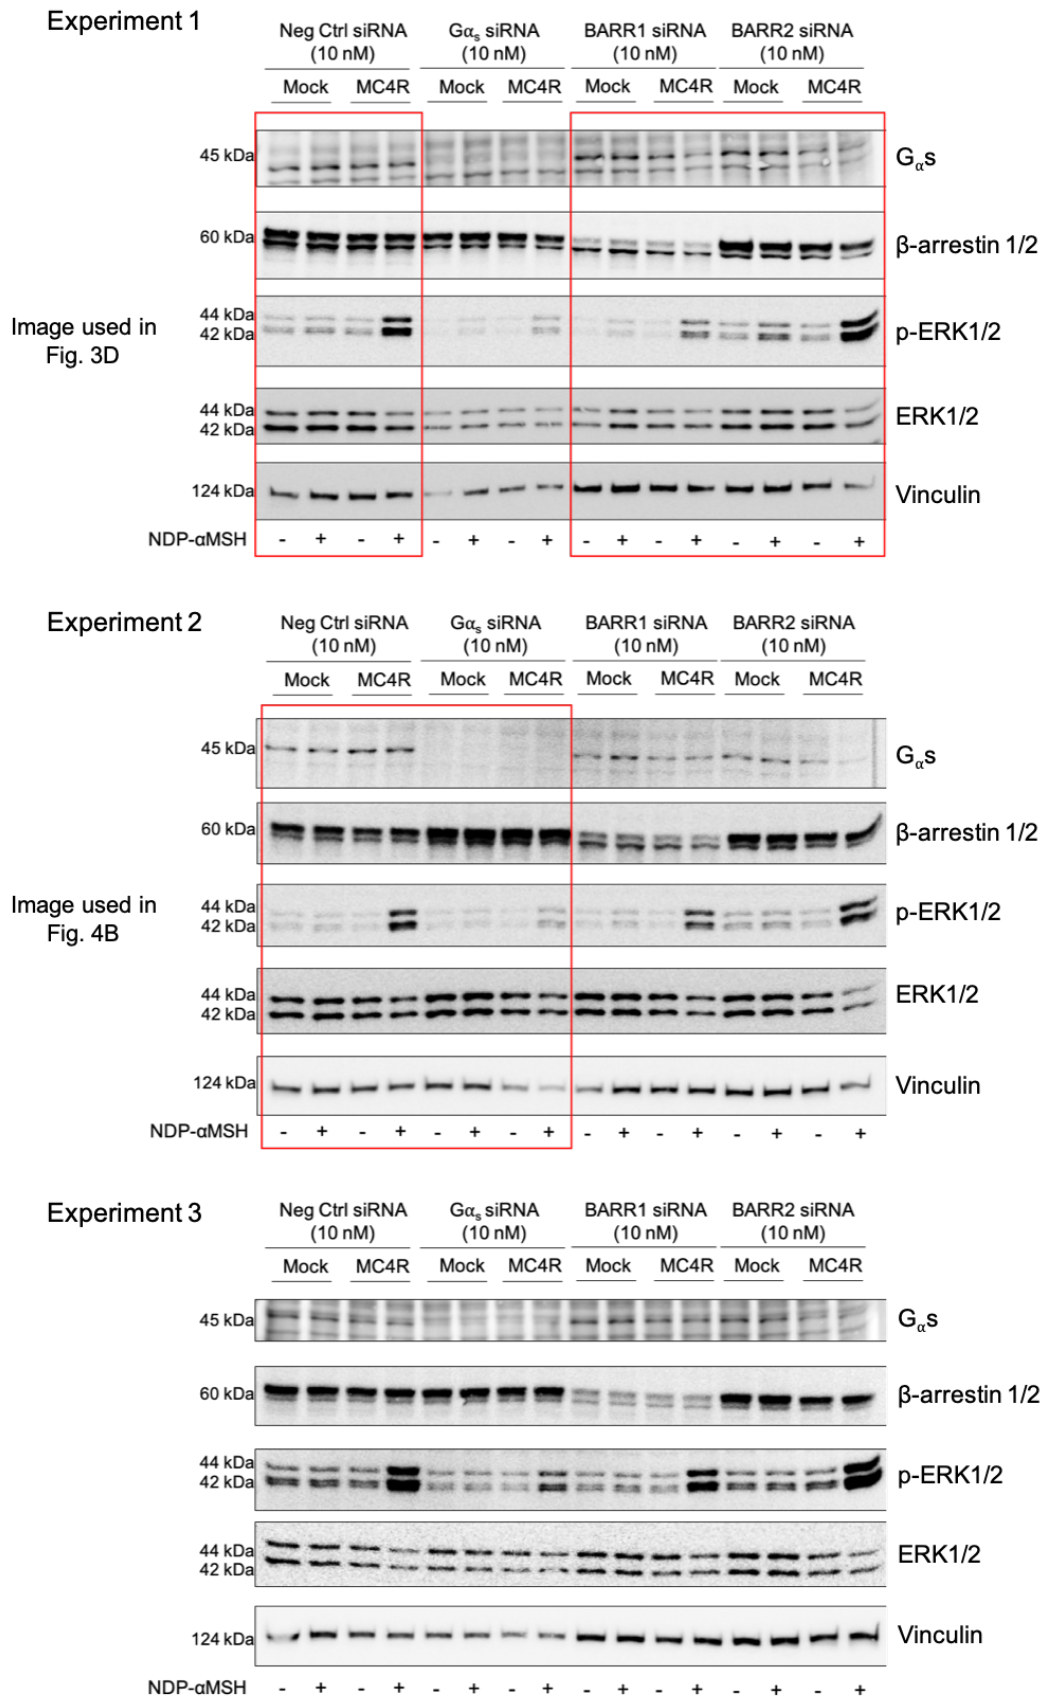

**Data S1. Uncropped immunoblot images. ERK1/2 Western Blot using siRNA treatment.**

Images in the red rectangles are the data showed in the corresponding figures. Related to Figure 3 and Figure 4.



## Data S1

### Experiment 1

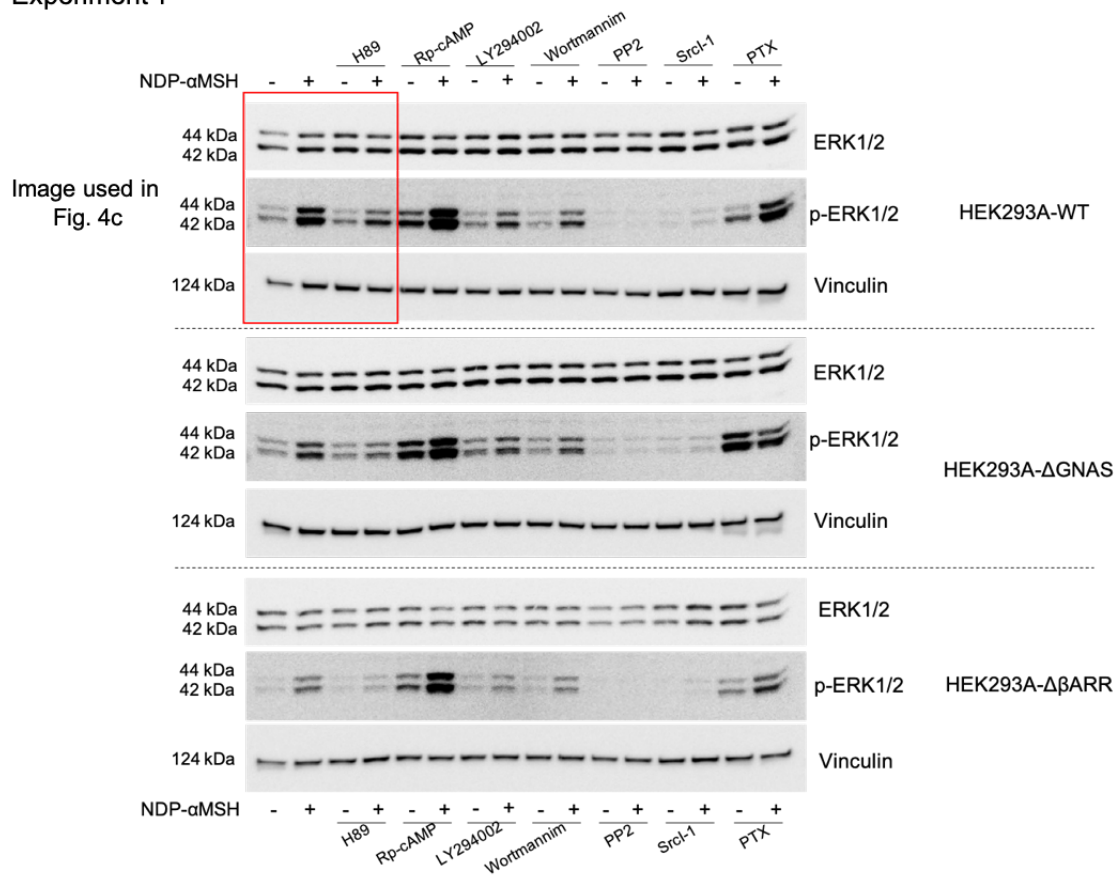

### Experiment 2

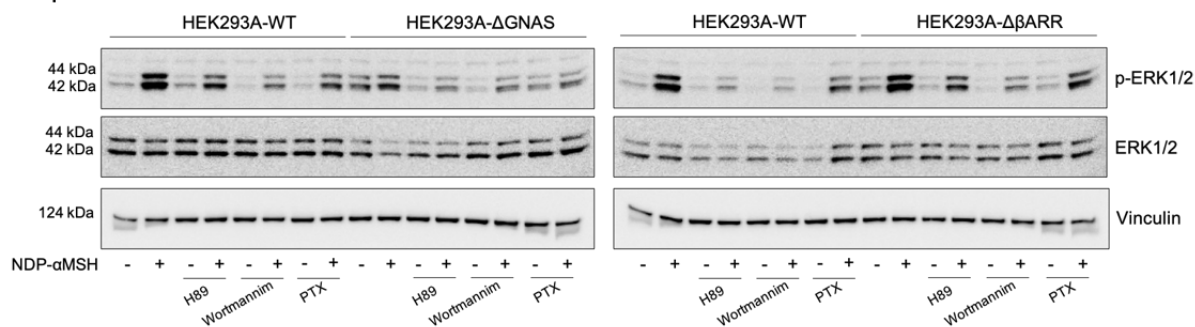

### Experiment 3

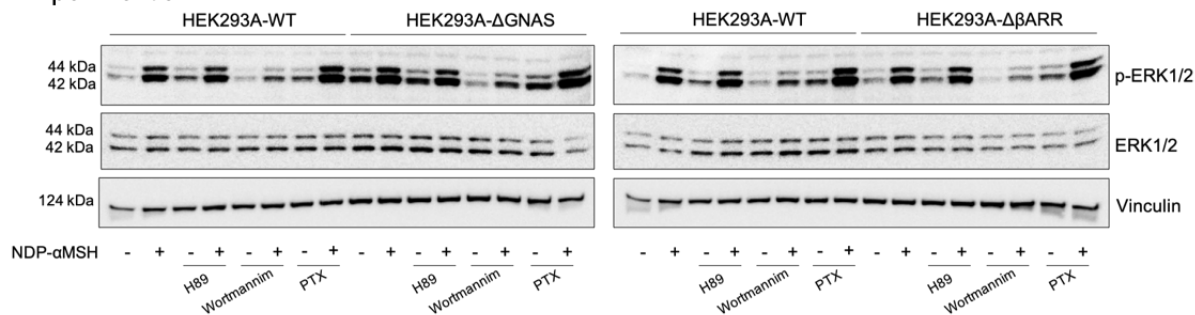

**Data S1. Uncropped immunoblot images. ERK1/2 Western Blot using pharmacological inhibitors (H89 treatment).** Images in the red rectangles are the data showed in the corresponding figures. Related to Figure 4c.
